# Supplementary material
Source: HighWire-hosted journal article supplement (https://jnm.snmjournals.org/highwire/filestream/95273/field_highwire_adjunct_files/0/199760_Supplemental_Data.pdf)
Supplement: 199760_Supplemental_Data.pdf [file 199760_Supplemental_Data.pdf]

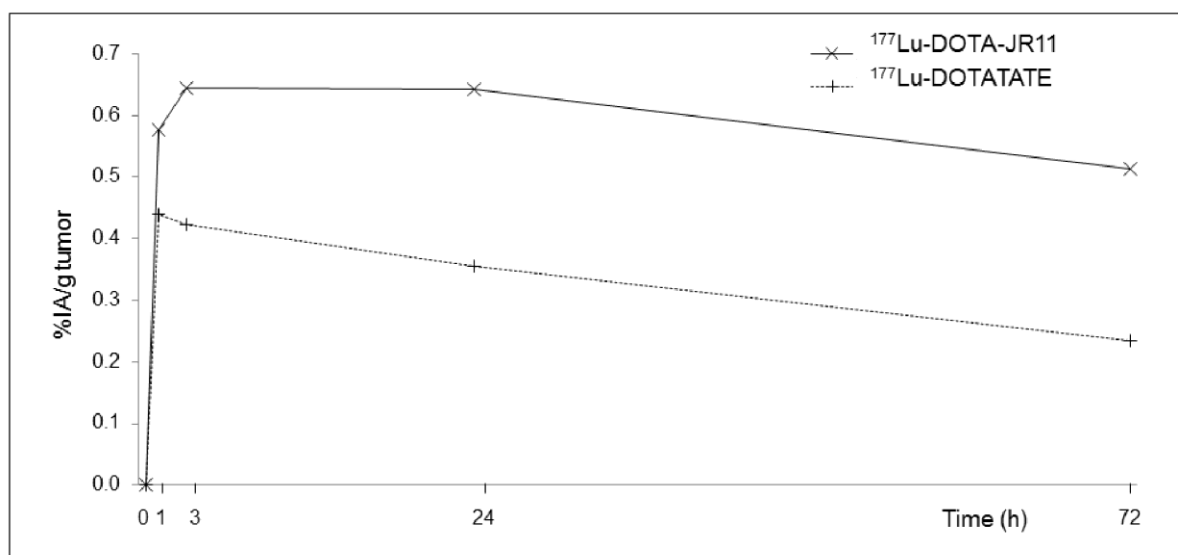

**SUPPLEMENTAL FIGURE 1.** Comparison of tumor uptake (%IA/g tumor) at 1, 3, 24 and 72 hours after injection of ~150 µg (~1 GBq) <sup>177</sup>Lu-DOTA-JR11 (<sup>177</sup>Lu-OPS201) and ~175 µg (~1 GBq) <sup>177</sup>Lu-DOTATATE in the same patients. Data are from Wild et al. J Nucl Med. 2014; 55:1248-52 and are the mean of the median %IA/g tumor of all measurable tumors (total of 12 tumors) in 4 patients with neuroendocrine neoplasm (G1 – G3). This graph confirms that the highest tumor uptake (%IA/g) is found between 3 and 24 hours for <sup>177</sup>Lu-OPS201 and at around 1 hour for <sup>177</sup>Lu-DOTATATE.

## The STARD 2015 list

The page number of the manuscript where the item can be found is specified at the end of each item row.

| Section and topic | No | Item                                                                                                                                                  |        |
|-------------------|----|-------------------------------------------------------------------------------------------------------------------------------------------------------|--------|
| Title or abstract |    |                                                                                                                                                       |        |
|                   | 1  | Identification as a study of diagnostic accuracy using at least one measure of accuracy (such as sensitivity, specificity, predictive values, or AUC) | Page 1 |
| Abstract          |    |                                                                                                                                                       |        |
|                   | 2  | Structured summary of study design, methods, results, and conclusions (for specific guidance, see STARD for Abstracts)                                | Page 2 |
| Introduction      |    |                                                                                                                                                       |        |
|                   | 3  | Scientific and clinical background, including the intended use and clinical role of the index test                                                    | Page 4 |
|                   | 4  | Study objectives and hypotheses                                                                                                                       | Page 5 |
| Methods           |    |                                                                                                                                                       |        |
| Study design      | 5  | Whether data collection was planned before the index test and reference standard were performed (prospective study)                                   | Page 6 |

| Section and topic | No  | Item                                                                                                                                                   |              |
|-------------------|-----|--------------------------------------------------------------------------------------------------------------------------------------------------------|--------------|
|                   |     | or after (retrospective study)                                                                                                                         |              |
| Participants      | 6   | Eligibility criteria                                                                                                                                   | Page 6       |
|                   | 7   | On what basis potentially eligible participants were identified (such as symptoms, results from previous tests, inclusion in registry)                 | Page 6       |
|                   | 8   | Where and when potentially eligible participants were identified (setting, location, and dates)                                                        | Page 6       |
|                   | 9   | Whether participants formed a consecutive, random, or convenience series                                                                               | Page 6       |
| Test methods      | 10a | Index test, in sufficient detail to allow replication                                                                                                  | Page 6 and 7 |
|                   | 10b | Reference standard, in sufficient detail to allow replication                                                                                          | Page 7       |
|                   | 11  | Rationale for choosing the reference standard (if alternatives exist)                                                                                  | Page 12      |
|                   | 12a | Definition of and rationale for test positivity cut-offs or result categories of the index test, distinguishing pre-specified from exploratory         | Page 7 and 8 |
|                   | 12b | Definition of and rationale for test positivity cut-offs or result categories of the reference standard, distinguishing pre-specified from exploratory | Page 8       |
|                   | 13a | Whether clinical information and reference standard results were available to the performers or readers of the index test                              | Page 7 and 8 |
|                   | 13b | Whether clinical information and index test results were available to the assessors of the reference standard                                          | Page 8       |
| Analysis          | 14  | Methods for estimating or comparing measures of diagnostic accuracy                                                                                    | Page 8       |
|                   | 15  | How indeterminate index test or reference standard results were handled                                                                                | Page 7 and 8 |
|                   | 16  | How missing data on the index test and reference standard were handled                                                                                 | N.A          |
|                   | 17  | Any analyses of variability in diagnostic accuracy, distinguishing pre-specified from exploratory                                                      | Page 8 and 9 |
|                   | 18  | Intended sample size and how it was determined                                                                                                         | Page 14      |
| <b>Results</b>    |     |                                                                                                                                                        |              |
| Participants      | 19  | Flow of participants, using a diagram                                                                                                                  | Page 24      |
|                   | 20  | Baseline demographic and clinical characteristics of participants                                                                                      | Page 18      |
|                   | 21a | Distribution of severity of disease in those with the target condition                                                                                 | Page 18      |
|                   | 21b | Distribution of alternative diagnoses in those without the target condition                                                                            | N.A          |

| <b>Section and topic</b> | <b>No</b> | <b>Item</b>                                                                                                 |                   |
|--------------------------|-----------|-------------------------------------------------------------------------------------------------------------|-------------------|
|                          | 22        | Time interval and any clinical interventions between index test and reference standard                      | <i>Page 10</i>    |
| Test results             | 23        | Cross tabulation of the index test results (or their distribution) by the results of the reference standard | <i>Page 20</i>    |
|                          | 24        | Estimates of diagnostic accuracy and their precision (such as 95% confidence intervals)                     | <i>Page 23</i>    |
|                          | 25        | Any adverse events from performing the index test or the reference standard                                 | <i>Page 5</i>     |
| <b>Discussion</b>        |           |                                                                                                             |                   |
|                          | 26        | Study limitations, including sources of potential bias, statistical uncertainty, and generalisability       | <i>Page 14</i>    |
|                          | 27        | Implications for practice, including the intended use and clinical role of the index test                   | <i>Page 12-14</i> |
| <b>Other information</b> |           |                                                                                                             |                   |
|                          | 28        | Registration number and name of registry                                                                    | <i>Page 6</i>     |
|                          | 29        | Where the full study protocol can be accessed                                                               | <i>Page 6</i>     |
|                          | 30        | Sources of funding and other support; role of funders                                                       | <i>Page 15</i>    |
